# Supplementary material for: Efficient and accurate density-based prediction of macromolecular polarizabilities
Source: Royal Society of Chemistry journal article supplement (doi:10.1039/d2cp04690c), 2022-12-19
Supplement: d2cp04690c3.pdf [file d2cp04690c3.pdf]

Supplementary Information for

---

---

Efficient yet accurate density-based description of  
macromolecular polarizabilities

Dongbo Zhao,<sup>a,†</sup> Yilin Zhao,<sup>b,†</sup> Xin He,<sup>c</sup> Paul W. Ayers<sup>b,\*</sup> and Shubin Liu<sup>d,e,\*</sup>

<sup>a</sup>Institute of Biomedical Research, Yunnan University, Kunming 650500, Yunnan, P.R. China

<sup>b</sup>Department of Chemistry and Chemical Biology, McMaster University, Hamilton, ONL8S 4M1  
Canada

<sup>c</sup>Qingdao Institute for Theoretical and Computational Sciences, Shandong University, Qingdao  
266237, Shandong, P.R. China

<sup>d</sup>Research Computing Center, University of North Carolina, Chapel Hill, North Carolina 27599-  
3420, USA

<sup>e</sup>Department of Chemistry, University of North Carolina, Chapel Hill, North Carolina 27599-3290,  
USA

\*Corresponding authors. Emails: [ayers@mcmaster.ca](mailto:ayers@mcmaster.ca); [shubin@email.unc.edu](mailto:shubin@email.unc.edu).

<sup>†</sup>These authors contributed equally.

**The Tkatchenko-Scheffler (TS) formula and its variant.** The original Tkatchenko-Scheffler (TS)

formula (eq S1) is given as follows:

$$\alpha_{mol}^{TS-old} = \sum_A \alpha_A^{eff} = \sum_A \alpha_A^{free} \left( \frac{V_A^{eff}}{V_A^{free}} \right) \quad (S1)$$

where the sum runs over all atoms in a molecule. The weights  $(V_n^{eff}/V_n^{free})$  measure the volume ratio for atom in a molecule to the free atom in vacuum are obtained by the Hirshfeld partitioning of the electron density.

Very recently, an improved TS formula is given in eq S2:

$$\alpha_{mol}^{TS} = \sum_A \alpha_A^{eff} = \sum_A \alpha_A^{free} \left( \frac{L_A^{eff}}{L_A^{free}} \right)^4 \quad (S2)$$

and its equivalent form can be expressed as:

$$\alpha_{mol}^{TS-new} = \sum_A \alpha_A^{eff} = \sum_A \alpha_A^{free} \left( \frac{V_A^{eff}}{V_A^{free}} \right)^{\frac{4}{3}} \quad (S3)$$

which allows us to keep the simplicity of the original TS method but make it consistent with the  $L^4$  scaling law. The characteristic length  $L$  is defined via the  $L^2$  norm of the position operator.

Based on the GEBF method, we propose to use the equations (GEBF-TS) proposed in this work for a macromolecule as given in eqs S4 and S5:

$$\alpha_{mol}^{GEBF-TS} = \sum_m C_m \sum_A \frac{\alpha_{m,A}^{free} V_A^{eff}}{V_A^{free}} \quad (S4)$$

and

$$\alpha_{mol}^{GEBF-TS} = \sum_m C_m \sum_A \alpha_{m,A}^{free} \left( \frac{V_A^{eff}}{V_A^{free}} \right)^{\frac{4}{3}} \quad (S5)$$

**Table S1.** The slope (a) and intercept (b) data of linear equations for inorganic systems in **Table 1** in text.

| systems                                         | S <sub>S</sub> |         | I <sub>F</sub>     |         | S <sub>GBP</sub> |         | E <sub>2</sub>     |         | E <sub>3</sub>      |         | rR <sub>2</sub> |         | rR <sub>3</sub> |         |
|-------------------------------------------------|----------------|---------|--------------------|---------|------------------|---------|--------------------|---------|---------------------|---------|-----------------|---------|-----------------|---------|
|                                                 | a              | b       | a                  | b       | a                | b       | a                  | b       | a                   | b       | a               | b       | a               | b       |
| Be                                              | 2.842          | 53.569  | 0.163              | 69.142  | 0.620            | 68.738  | 2.052              | 70.621  | 0.207               | 69.891  | 4.153           | 69.203  | 4.032           | 65.854  |
| Mg                                              | -15.918        | 212.158 | 0.048              | 109.179 | 0.622            | 105.706 | 0.163              | 109.425 | 0.001               | 109.032 | 4.209           | 110.992 | 4.157           | 113.617 |
| Na                                              | -29.625        | 501.736 | 0.075              | 352.646 | 0.881            | 349.837 | 0.285              | 352.995 | 0.001               | 352.906 | 6.041           | 349.914 | 6.017           | 344.027 |
| S                                               | -0.348         | -0.947  | 0.002              | -1.406  | 0.031            | -1.440  | 0.004              | -1.401  | 6×10 <sup>-6</sup>  | -1.401  | 0.209           | -1.390  | 0.207           | -1.370  |
| Au                                              | -0.149         | -22.954 | 4×10 <sup>-4</sup> | -23.471 | 0.337            | -24.667 | 1×10 <sup>-4</sup> | -23.467 | 4×10 <sup>-10</sup> | -23.467 | 0.539           | -23.514 | 0.539           | -23.612 |
| HF                                              | 1.756          | -1.912  | 0.008              | -1.426  | 0.064            | -1.426  | 0.037              | -1.408  | 3×10 <sup>-4</sup>  | -1.413  | 0.433           | -1.446  | 0.424           | -1.497  |
| H <sub>2</sub> O                                | 1.139          | -3.882  | 0.018              | -2.901  | 0.121            | -2.895  | 0.102              | -2.799  | 0.001               | -2.814  | 0.810           | -3.003  | 0.782           | -3.312  |
| H <sup>+</sup> ·(H <sub>2</sub> O) <sub>n</sub> | 1.133          | -4.737  | 0.018              | -4.558  | 0.120            | -4.510  | 0.101              | -4.433  | 0.001               | -4.409  | 0.805           | -4.138  | 0.777           | -4.008  |
| CO <sub>2</sub>                                 | 1.802          | -5.037  | 0.014              | -2.630  | 0.104            | -2.654  | 0.080              | -2.516  | 0.001               | -2.521  | 0.703           | -2.562  | 0.690           | -2.616  |
| Cl <sup>-</sup> ·(NaCl) <sub>n</sub>            | -1.469         | 16.720  | 0.007              | 8.099   | 0.120            | 9.532   | 0.019              | 5.929   | 3×10 <sup>-5</sup>  | 2.973   | 0.808           | 8.491   | 0.801           | 6.969   |
| fullerene                                       | 2.235          | -33.268 | 0.040              | -22.488 | 0.240            | -23.125 | 0.308              | -22.128 | 0.009               | -22.352 | 1.589           | -21.812 | 1.534           | -20.947 |
| BN                                              | 1.747          | -19.541 | 0.028              | -14.981 | 0.172            | -15.049 | 0.201              | -14.720 | 0.004               | -14.899 | 1.144           | -14.797 | 1.102           | -14.737 |
| ZnS                                             | -0.639         | -78.052 | 0.005              | -79.858 | 0.139            | -80.192 | 0.006              | -79.840 | 1×10 <sup>-6</sup>  | -79.853 | 0.933           | -80.02  | 0.927           | -80.319 |

  

| systems                                         | G <sub>1</sub> |          | G <sub>2</sub> |         | G <sub>3</sub> |         | I <sub>G</sub> |           | Vol   |         | Θ <sub>iso</sub> |         |
|-------------------------------------------------|----------------|----------|----------------|---------|----------------|---------|----------------|-----------|-------|---------|------------------|---------|
|                                                 | a              | b        | a              | b       | a              | b       | a              | b         | a     | b       | a                | b       |
| Be                                              | 23.626         | 107.173  | -19.590        | 89.781  | 4.713          | 105.987 | 373.071        | 25.617    | 0.160 | 16.343  | -2.990           | 67.785  |
| Mg                                              | -218.581       | 331.026  | 638.612        | 232.314 | 20.212         | 284.287 | 1291.7         | 354.051   | 0.212 | 7.970   | -4.623           | 80.092  |
| Na                                              | -271.792       | 564.302  | 307.67         | 666.133 | 51.071         | 586.072 | 5879.188       | -1200.717 | 0.275 | 336.336 | -7.660           | 330.870 |
| S                                               | -4.651         | 0.521    | 8.685          | 0.512   | 0.668          | 1.157   | 95.812         | 1.108     | 0.018 | -2.389  | -0.261           | -1.322  |
| Au                                              | -198.533       | 27.289   | 233.489        | 84.277  | 8.564          | 67.808  | 8600.3         | -350.028  | 0.204 | -76.94  | -1.862           | -16.797 |
| HF                                              | 15.328         | 7.625    | -5.462         | -1.679  | 0.650          | 0.817   | 48.57          | 1.084     | 0.036 | -2.953  | -0.724           | 0.114   |
| H <sub>2</sub> O                                | -149.091       | -59.811  | -8.969         | 0.694   | 0.771          | 0.721   | 72.072         | -15.033   | 0.051 | -1.673  | -1.318           | -2.570  |
| H <sup>+</sup> ·(H <sub>2</sub> O) <sub>n</sub> | -68.874        | -174.427 | -9.157         | 15.159  | 0.763          | -3.115  | 72.404         | 35.460    | 0.052 | -5.900  | -1.756           | 13.151  |
| CO <sub>2</sub>                                 | -5.217         | -3.567   | 10.243         | -8.850  | 0.748          | 3.335   | 128.955        | -7.999    | 0.059 | -5.109  | -0.971           | -2.545  |
| Cl <sup>-</sup> ·(NaCl) <sub>n</sub>            | -92.142        | 346.011  | -180.45        | -659.29 | 4.284          | 43.539  | 187.072        | -240.835  | 0.073 | -10.377 | -1.107           | -78.332 |
| fullerene                                       | -3.791         | -21.469  | 5.002          | -28.39  | 1.167          | -12.911 | 178.98         | 3.470     | 0.140 | -42.282 | -1.575           | -27.901 |
| BN                                              | 7.250          | -0.516   | -4.482         | 1.738   | 0.902          | -7.141  | 103.669        | -24.402   | 0.108 | -47.547 | -1.279           | -15.974 |
| ZnS                                             | -84.901        | -128.41  | 817.019        | 277.001 | 4.517          | -51.717 | 536.141        | -137.18   | 0.133 | -177.29 | -1.496           | -69.243 |

**Table S2.** The slope (a) and intercept (b) data of linear equations for organic and biological systems in **Table 2** in text.

| systems                                       | S <sub>S</sub> |          | I <sub>F</sub> |           | S <sub>GBP</sub> |           | E <sub>2</sub> |           | E <sub>3</sub>      |          | r <sub>R2</sub> |           | r <sub>R3</sub> |          |
|-----------------------------------------------|----------------|----------|----------------|-----------|------------------|-----------|----------------|-----------|---------------------|----------|-----------------|-----------|-----------------|----------|
|                                               | a              | b        | a              | b         | a                | b         | a              | b         | a                   | b        | a               | b         | a               | b        |
| polyene                                       | 5.965          | -286.538 | 0.183          | -248.663  | 0.960            | -260.283  | 1.440          | -247.035  | 0.041               | -246.799 | 6.322           | -260.891  | 5.974           | -262.735 |
| polyyne                                       | 9.309          | -331.732 | 0.192          | -270.763  | 1.150            | -284.868  | 1.498          | -269.095  | 0.042               | -268.923 | 7.745           | -286.387  | 7.475           | -289.501 |
| acene                                         | 3.716          | -183.391 | 0.090          | -148.446  | 0.507            | -157.695  | 0.706          | -147.281  | 0.020               | -147.103 | 3.350           | -158.252  | 3.197           | -159.851 |
| all- <i>trans</i>                             | 4.131          | -119.832 | 0.079          | -93.213   | 0.486            | -99.229   | 0.551          | -92.482   | 0.011               | -92.473  | 3.244           | -99.722   | 3.118           | -101.010 |
| push-pull                                     | 7.278          | -160.745 | 0.036          | -96.366   | 0.368            | -119.745  | 0.111          | -68.914   | 2×10 <sup>-4</sup>  | -42.888  | 2.454           | -119.010  | 2.380           | -118.958 |
| octane                                        | 6.853          | -505.377 | 1.451          | -2841.300 | 6.425            | -2763.602 | 6.781          | -1644.672 | 0.024               | -119.630 | 29.883          | -1951.981 | 11.146          | -723.865 |
| base pairs                                    | 2.284          | -61.598  | 0.029          | -0.406    | 0.211            | -25.122   | 0.170          | 24.510    | 0.001               | 139.209  | 1.411           | -26.528   | 1.384           | -30.272  |
| (C <sub>6</sub> H <sub>6</sub> ) <sub>n</sub> | 1.441          | 1.539    | 0.044          | 3.914     | 0.229            | 4.078     | 0.343          | 4.217     | 0.010               | 3.841    | 1.503           | 4.371     | 1.422           | 3.927    |
| amino acids                                   | 1.290          | 10.357   | 0.027          | -5.749    | 0.221            | -45.850   | 0.032          | 106.644   | -9×10 <sup>-7</sup> | 133.308  | 1.462           | -45.721   | 1.396           | -45.878  |
| dipeptides                                    | 1.276          | 19.363   | 13.502         | 669.760   | 0.263            | 800.745   | 2.212          | 117.472   | 0.285               | 2297.81  | 1.456           | -46.452   | 14.676          | 105.931  |
| tripeptides                                   | 1.285          | 29.492   | 0.027          | 19.339    | 0.222            | -63.175   | 0.032          | 231.670   | -1×10 <sup>-6</sup> | 282.430  | 1.469           | -64.451   | 1.115           | 5.841    |
| α-helix                                       | 1.406          | -8.606   | 0.029          | -3.102    | 0.177            | -5.067    | 0.198          | -2.892    | 0.003               | -1.516   | 1.169           | -6.196    | 1.116           | -7.184   |
| 3 <sub>10</sub> -helix                        | 1.404          | -5.790   | 0.029          | -1.335    | 0.177            | -3.268    | 0.198          | -1.223    | 0.003               | 0.206    | 1.170           | -4.476    | 1.117           | -5.382   |
| β-sheet                                       | 1.454          | -14.461  | 0.031          | -12.155   | 0.184            | -12.263   | 0.207          | -13.037   | 0.004               | -15.584  | 1.217           | -12.194   | 1.160           | -12.333  |

  

| systems                                       | G <sub>1</sub> |          | G <sub>2</sub> |          | G <sub>3</sub> |          | I <sub>G</sub> |          | Vol     |          | Θ <sub>iso</sub>   |          |
|-----------------------------------------------|----------------|----------|----------------|----------|----------------|----------|----------------|----------|---------|----------|--------------------|----------|
|                                               | a              | b        | a              | b        | a              | b        | a              | b        | a       | b        | a                  | b        |
| polyene                                       | -13.545        | -267.687 | 18.052         | -265.26  | 5.113          | -250.311 | 429.681        | -304.233 | 0.335   | -283.439 | -7.765             | -258.650 |
| polyyne                                       | -18.976        | -297.677 | 28.783         | -337.798 | 7.425          | -275.075 | 913.626        | -414.168 | 0.444   | -318.315 | -12.849            | -357.770 |
| acene                                         | -7.516         | -164.657 | 9.910          | -162.507 | 2.596          | -150.950 | 277.713        | -199.705 | 0.230   | -204.044 | -4.265             | -162.370 |
| all- <i>trans</i>                             | -13.633        | -110.659 | 23.967         | -106.599 | 2.720          | -92.385  | 318.904        | -141.212 | 0.208   | -119.272 | -2.171             | 21.968   |
| push-pull                                     | -8.615         | -43.567  | 11.473         | -10.900  | 2.676          | -128.060 | 313.697        | -137.247 | 0.179   | -124.434 | -2.791             | -90.512  |
| octane                                        | -13.117        | -345.001 | 1.396          | 62.909   | -1.613         | 245.143  | 42.257         | 40.916   | 0.007   | 87.895   | -0.886             | 48.131   |
| base pairs                                    | 0.595          | 187.221  | -2.782         | 204.831  | 1.093          | -14.576  | 0.089          | -3.365   | 0.595   | 187.221  | -0.862             | 86.547   |
| (C <sub>6</sub> H <sub>6</sub> ) <sub>n</sub> | -3.242         | 30.994   | 4.244          | 81.139   | 1.155          | 16.161   | 106.005        | -9.943   | 0.090   | -33.578  | -1.849             | 7.548    |
| amino acids                                   | -3.373         | 25.857   | 4.16           | 56.666   | 1.085          | -24.730  | 98.166         | -26.206  | 0.078   | -10.247  | -1.951             | -39.870  |
| dipeptides                                    | 14.070         | 88.583   | -31.038        | 1142.760 | 38.555         | 1501.210 | 10.606         | 398.525  | 290.952 | 1931.1   | -0.296             | 165.580  |
| tripeptides                                   | 0.009          | 1.028    | 0.007          | 1.394    | -0.009         | 2.575    | 0.012          | 2.719    | 0.005   | 1.765    | 5×10 <sup>-3</sup> | 282.960  |
| α-helix                                       | -3.521         | 170.222  | 4.746          | 305.087  | 0.917          | -2.416   | 94.612         | -47.349  | 0.089   | -68.006  | -1.514             | 9.112    |
| 3 <sub>10</sub> -helix                        | -3.530         | 172.497  | 4.758          | 309.932  | 0.926          | -2.834   | 93.593         | -43.945  | 0.084   | -54.842  | -1.544             | 4.281    |
| β-sheet                                       | -4.616         | -5.806   | 7.946          | -3.567   | 0.978          | -8.001   | 90.514         | -17.983  | 0.083   | -11.191  | -1.691             | -16.091  |

**Table S3.** Molecular polarizabilities (in Bohr<sup>3</sup>) of fullerene cages (C<sub>100</sub> and C<sub>180</sub>), 15 tetrapeptides and 10 proteins, predicted by the original TS approach<sup>a</sup> with the molecular wavefunction obtained at the M06-2X/def2-TZVP level.

| systems                   | eq S1  |           |        | eq S3     | conv.  |
|---------------------------|--------|-----------|--------|-----------|--------|
|                           | Becke  | Hirshfeld | avg.   | Hirshfeld |        |
| <b>fullerenes</b>         |        |           |        |           |        |
| C <sub>100</sub>          | 626.5  | 1019.2    | 822.9  | 984.5     | 993.7  |
| C <sub>180</sub>          | 1119.4 | 1827.0    | 1473.2 | 1762.2    | 1932.5 |
| <b>tetrapeptides</b>      |        |           |        |           |        |
| Ala_Ser_Tyr_Asp           | 265.8  | 400.8     | 333.3  | 381.4     | 323.0  |
| Cys_Ala_Val_Thr           | 247.0  | 365.3     | 306.2  | 344.2     | 289.7  |
| Asp_Tyr_Cys_Ala           | 279.7  | 416.7     | 348.2  | 397.6     | 336.2  |
| Glu_Trp_Ser_Gln           | 321.1  | 485.0     | 403.1  | 461.5     | 399.3  |
| Phe_Val_Tyr_Ser           | 319.8  | 482.6     | 401.2  | 455.6     | 390.6  |
| Gly_Thr_Gln_His           | 260.7  | 389.7     | 325.2  | 368.1     | 314.4  |
| His_Ser_Cys_Trp           | 319.0  | 472.8     | 395.9  | 448.7     | 396.2  |
| Leu_Arg_Pro_Gln           | 314.7  | 479.2     | 397.0  | 448.8     | 371.2  |
| Thr_Gln_Asp_Ala           | 252.6  | 379.6     | 316.1  | 360.6     | 301.2  |
| Val_Pro_Ala_Phe           | 281.1  | 423.2     | 352.2  | 398.0     | 340.0  |
| Arg_Cys_Glu_Gly           | 273.3  | 406.1     | 339.7  | 384.3     | 328.0  |
| Cys_Ile_Arg_Asn           | 305.4  | 457.1     | 381.3  | 429.6     | 361.3  |
| Glu_Trp_Tyr_Glu           | 371.9  | 555.8     | 463.9  | 531.1     | 467.6  |
| Phe_Gly_Asn_Asn           | 267.1  | 400.6     | 333.9  | 378.9     | 325.9  |
| Pro_Tyr_Pro_Ser           | 281.3  | 427.8     | 354.6  | 403.4     | 337.7  |
| <b>proteins</b>           |        |           |        |           |        |
| 4TTK                      | 819.8  | 1259.9    | 1039.8 | 1192.1    | 985.4  |
| 2LDJ                      | 1192.4 | 1864.3    | 1528.3 | 1766.2    | 1435.2 |
| 2LL5                      | 1105.3 | 1718.6    | 1411.9 | 1634.3    | 1335.1 |
| 2LYE                      | 1401.9 | 2140.6    | 1771.3 | 1569.6    | 1355.1 |
| 5JI4                      | 1113.3 | 1665.5    | 1389.4 | 3102.2    | 2513.6 |
| 1SP7                      | 1151.6 | 1807.5    | 1479.6 | 2028.6    | 1657.3 |
| 1L2Y                      | 2214.4 | 3465.7    | 2840.0 | 1712.7    | 1375.0 |
| 2F4K                      | 2154.4 | 3881.2    | 3017.8 | 3290.1    | 2647.0 |
| 6PHM                      | 1762.6 | 2745.2    | 2253.9 | 2610.7    | 2168.6 |
| 1CBN                      | 2502.2 | 3881.1    | 3191.6 | 3690.1    | 3010.1 |
| <b>MAE(%)<sup>b</sup></b> | 22.0   | 30.0      | 26.0   | 18.2      |        |

<sup>a</sup>Two partition schemes of Becke and Hirshfeld are employed.

<sup>b</sup>MAE: mean absolute error.

**Table S4.** Molecular polarizabilities (in Bohr<sup>3</sup>) based on the subsystem wavefunctions obtained at the M06-2X/def2-TZVP level of 12 protein systems.

| systems                   | GEBF-TS |        | GEBF   |
|---------------------------|---------|--------|--------|
|                           | eq S4   | eq S5  |        |
| 4TTK                      | 819.8   | 1192.2 | 982.7  |
| 2LDJ                      | 1864.4  | 1766.1 | 1438.8 |
| 2LL5                      | 1718.6  | 1633.9 | 1332.2 |
| 2LYE                      | 1665.5  | 1569.5 | 1345.4 |
| 5JI4                      | 3255.2  | 3102.2 | 2513.6 |
| 1SP7                      | 2140.7  | 2028.8 | 1661.3 |
| 1L2Y                      | 1807.5  | 1712.7 | 1379.7 |
| 2F4K                      | 3465.3  | 3289.3 | 2663.7 |
| 6PHM                      | 2745.2  | 2610.7 | 2143.7 |
| 1CBN                      | 3881.3  | 3690.3 | 3007.2 |
| 1UBQ                      | 7182.6  | 6801.3 | 5574.8 |
| 1K6F                      | 6368.4  | 6018.6 | 4833.3 |
| <b>MAE(%)<sup>a</sup></b> | 29.0    | 22.3   |        |

<sup>a</sup>MAE: mean absolute error.

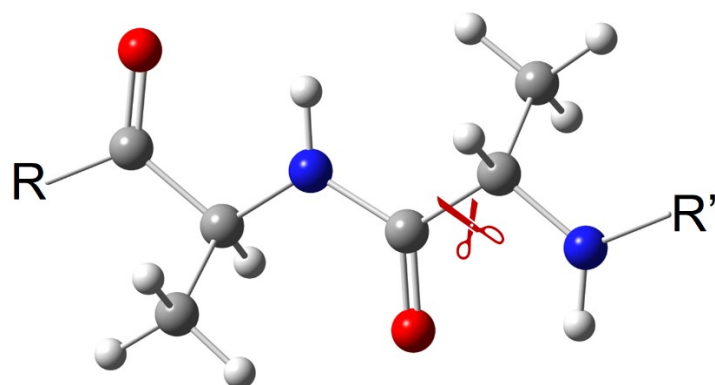

**Fig. S1 Fragmentation details of proteins.** For clarity, we only employ a dipeptide (R-Ala-Ala-R', R and R' are natural amino acids) where the single C-C bond is cut. Color code: H in white, C in grey, N in blue and O in red.

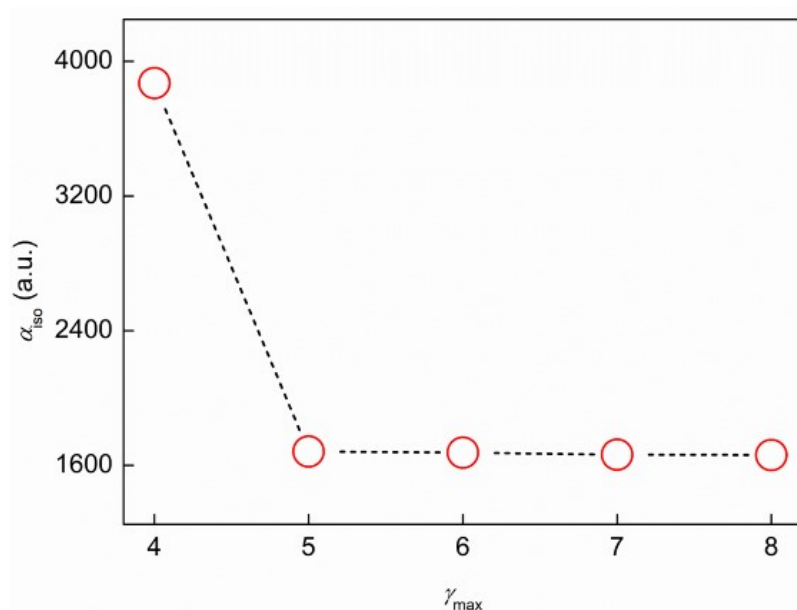

**Fig. S2** Convergence check of molecular polarizabilities of 1SP7 with respect to the maximum number of fragments in a subsystem ( $\gamma_{\max}$ ).

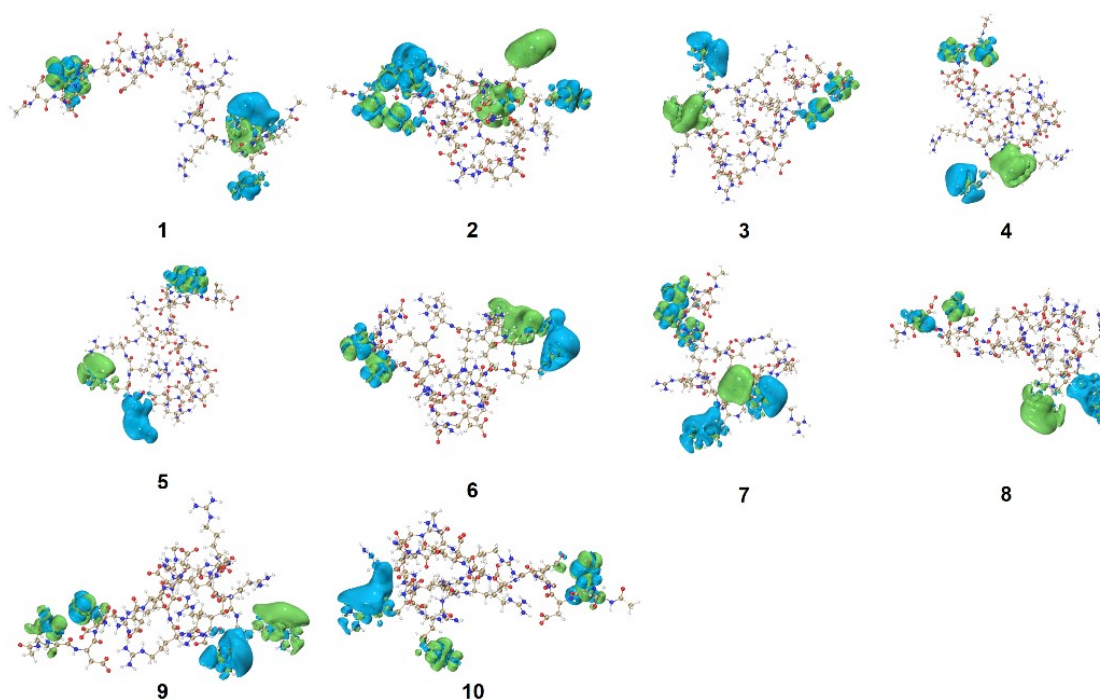

**Fig. S3** Spin density maps (at the UHF/cc-pVDZ level) of 10 representative  $D_{10}R_{10}$  structures from classical MD simulations with the ff19SB force fields for  $D_{10}R_{10}$  and TIP3P for water molecules (not shown here). The isovalue is 0.0004 a.u.
